# Supplementary material
Source: publisher figshare collection journal article supplement (https://acs.figshare.com/ndownloader/files/4164340)
Supplement: Supplementary file 1 [file 4164340]

data_General
_audit_creation_date                  '2010-11-17'
_audit_creation_method                'by CrystalStructure 3.8'
_audit_update_record                   ?

#==============================================================================

# PROCESSING SUMMARY (IUCr Office Use Only)

_journal_date_recd_electronic     ?
_journal_date_from_coeditor       ?
_journal_date_accepted            ?
_journal_coeditor_code            ?

#==============================================================================

# SUBMISSION DETAILS

_publ_contact_author_name             'Professor Masakatsu Matsumoto'
_publ_contact_author_email            'matsumo-chem@kanagawa-u.ac.jp'
_publ_contact_author_fax              '81(463)589684'
_publ_contact_author_phone            '81(463)594111'
_publ_contact_letter
;
    ENTER TEXT OF LETTER
;
_publ_requested_journal               'J. Org. Chem'
_publ_requested_category              'FA'
_publ_requested_coeditor_name          ?

#==============================================================================

# TITLE AND AUTHOR LIST

_publ_section_title
;
    ENTER SECTION TITLE
;
_publ_section_title_footnote
;
    ENTER FOOTNOTE TO TITLE OF PAPER
;
loop_
_publ_author_name
_publ_author_footnote
_publ_author_address
' Masatoshi Tanimura '
;
  Department of Chemistry
  Kanagawa University
;
;
  Tsuchiya, Hiratsuka, Kanagawa 259-1293 Japan
;
_publ_section_synopsis
;
  ENTER SYNOPSIS
;

#==============================================================================

# TEXT

_publ_section_abstract
;
    ENTER ABSTRACT
;
_publ_section_comment
;
    ENTER TEXT
;
_publ_section_references
;
    ENTER OTHER REFERENCES

    Rigaku Americas and Rigaku Corporation. (2007).
    CrystalStructure (Version 3.8). 
    Single Crystal Structure Analysis Software.
    Rigaku Americas, 9009 TX, USA 77381-5209.
    Rigaku, Tokyo 196-8666, Japan.

    Altomare, A., Cascarano, G., Giacovazzo, C., Guagliardi, A., 
    Burla, M., Polidori, G., and Camalli, M. (1994) J. Appl. Cryst., 27, 435. 
    SIR92

    Carruthers, J.R., Rollett,J.S., Betteridge, P.W.,
	 Kinna, D., Pearce, L., Larsen, A., and Gabe, E.(1999)
    CRYSTALS Issue 11, Chemical Crystallography Laboratory, Oxford, UK.

;
_publ_section_figure_captions
;
    ENTER FIGURE CAPTIONS
;
_publ_section_exptl_prep
;
    ENTER COMPOUND PREPARATION DETAILS
;
_publ_section_exptl_refinement
;
    ENTER SPECIAL DETAILS OF THE REFINEMENT
;

#==============================================================================

data___10-trans

#==============================================================================

# CHEMICAL DATA

_chemical_formula_sum                  'C24 H25 Cl3 N O4 S '
_chemical_formula_moiety               'C23 H25 N O4 S CHCl3'
_chemical_formula_weight               529.88
_chemical_melting_point                ?

#==============================================================================

# CRYSTAL DATA
_symmetry_cell_setting                 monoclinic
_symmetry_space_group_name_H-M        'P 1 21/n 1'
_symmetry_space_group_name_Hall       '-P 2yn'
_symmetry_Int_Tables_number            14
loop_
_symmetry_equiv_pos_site_id
_symmetry_equiv_pos_as_xyz
1   '+X,+Y,+Z'
2   '1/2-X,1/2+Y,1/2-Z'
3   '-X,-Y,-Z'
4   '1/2+X,1/2-Y,1/2+Z'

#------------------------------------------------------------------------------

_cell_length_a                         11.064(7)
_cell_length_b                         15.260(10)
_cell_length_c                         14.585(10)
_cell_angle_alpha                      90.0000
_cell_angle_beta                       100.06(2)
_cell_angle_gamma                      90.0000
_cell_volume                           2424(3)
_cell_formula_units_Z                  4
_cell_measurement_reflns_used          7643
_cell_measurement_theta_min            3.0
_cell_measurement_theta_max            27.5
_cell_measurement_temperature          150.0

#------------------------------------------------------------------------------

_exptl_crystal_description            'block'
_exptl_crystal_colour                 'yellow'
_exptl_crystal_size_max                0.49
_exptl_crystal_size_mid                0.32
_exptl_crystal_size_min                0.29
_exptl_crystal_density_diffrn          1.452
_exptl_crystal_density_meas            ?
_exptl_crystal_density_method         'not measured'
_exptl_crystal_F_000                   1100.00
_exptl_absorpt_coefficient_mu          0.495
_exptl_absorpt_correction_type         multi-scan
_exptl_absorpt_process_details         
'Jacobson, R. (1998) Private communication'
_exptl_absorpt_correction_T_min        0.671
_exptl_absorpt_correction_T_max        0.866

#==============================================================================

# EXPERIMENTAL DATA

_diffrn_ambient_temperature            150.0
_diffrn_radiation_type                'Mo K\a'
_diffrn_radiation_wavelength           0.71075
_diffrn_measurement_device_type       'Rigaku Mercury'
_diffrn_measurement_method             \w
_diffrn_detector_area_resol_mean       7.31
_diffrn_reflns_number                  25782
_diffrn_reflns_av_R_equivalents        0.069
_diffrn_reflns_theta_max               27.86
_diffrn_measured_fraction_theta_max    0.982
_diffrn_reflns_theta_full              27.86
_diffrn_measured_fraction_theta_full   0.982
_diffrn_reflns_limit_h_min             -12
_diffrn_reflns_limit_h_max             14
_diffrn_reflns_limit_k_min             -20
_diffrn_reflns_limit_k_max             19
_diffrn_reflns_limit_l_min             -18
_diffrn_reflns_limit_l_max             19

#==============================================================================

# REFINEMENT DATA

_refine_special_details
;
    Refinement was performed using all reflections. The weighted 
    R-factor (wR) and goodness of fit (S) are based on F^2^.
    R-factor (gt) are based on F. The threshold expression of
    F^2^ > 2.0 sigma(F^2^) is used only for calculating R-factor (gt).
;
_reflns_number_total                   5672
_reflns_number_gt                      1703
_reflns_threshold_expression           F^2^>2.0\s(F^2^)
_refine_ls_structure_factor_coef       Fsqd
_refine_ls_R_factor_gt                 0.1498
_refine_ls_wR_factor_ref               0.3072
_refine_ls_hydrogen_treatment          refall
_refine_ls_number_reflns               5672
_refine_ls_number_parameters           323
_refine_ls_goodness_of_fit_ref         1.051
_refine_ls_weighting_scheme            calc
_refine_ls_weighting_details
'w = 1/[0.0270Fo^2^ + 1.0000\s(Fo^2^)]/(4Fo^2^)'
_refine_ls_shift/su_max                0.0000
_refine_diff_density_max               1.21
_refine_diff_density_min               -1.91
_refine_ls_extinction_method           none
_refine_ls_extinction_coef             ?

loop_
_atom_type_symbol
_atom_type_description
_atom_type_scat_dispersion_real
_atom_type_scat_dispersion_imag
_atom_type_scat_source
  'C' 'C'  0.003 0.002 
;
International Tables for Crystallography
(1992, Vol. C, Tables 4.2.6.8 and 6.1.1.4)
;
  'H' 'H'  0.000 0.000 
;
International Tables for Crystallography
(1992, Vol. C, Table 6.1.1.4)
;
  'N' 'N'  0.006 0.003 
;
International Tables for Crystallography
(1992, Vol. C, Tables 4.2.6.8 and 6.1.1.4)
;
  'O' 'O'  0.011 0.006 
;
International Tables for Crystallography
(1992, Vol. C, Tables 4.2.6.8 and 6.1.1.4)
;
  'S' 'S'  0.125 0.123 
;
International Tables for Crystallography
(1992, Vol. C, Tables 4.2.6.8 and 6.1.1.4)
;
  'Cl' 'Cl'  0.148 0.159 
;
International Tables for Crystallography
(1992, Vol. C, Tables 4.2.6.8 and 6.1.1.4)
;

#==============================================================================

# ATOMIC COORDINATES AND THERMAL PARAMETERS

loop_
_atom_site_label
_atom_site_type_symbol
_atom_site_fract_x
_atom_site_fract_y
_atom_site_fract_z
_atom_site_U_iso_or_equiv
_atom_site_adp_type
_atom_site_occupancy
_atom_site_symmetry_multiplicity
_atom_site_calc_flag
_atom_site_refinement_flags
_atom_site_disorder_assembly
_atom_site_disorder_group
 Cl(2) Cl 0.5451(2) 0.5117(2) 0.6554(2) 0.1254(13) Uani 1.00 1 d . . .
 Cl(3) Cl 0.5547(2) 0.4195(2) 0.8224(2) 0.1381(15) Uani 1.00 1 d . . .
 Cl(4) Cl 0.4011(3) 0.3612(2) 0.6591(3) 0.192(2) Uani 1.00 1 d . . .
 S(1) S 0.6067(2) -0.06482(19) 0.5945(2) 0.0862(9) Uani 1.00 1 d . . .
 O(1) O 0.5951(7) -0.0255(6) 0.7669(5) 0.119(3) Uani 1.00 1 d . . .
 O(5) O 0.6317(4) 0.2317(3) 0.5495(3) 0.0660(18) Uani 1.00 1 d . . .
 O(6) O 0.7917(4) 0.1370(3) 0.5442(3) 0.0627(18) Uani 1.00 1 d . . .
 O(7) O 0.7908(4) 0.3514(3) 0.6425(3) 0.0647(18) Uani 1.00 1 d . . .
 N(1) N 0.7188(6) 0.0624(4) 0.5396(5) 0.065(2) Uani 1.00 1 d . . .
 C(1) C 0.7755(6) 0.3176(5) 0.4806(5) 0.057(2) Uani 1.00 1 d . . .
 C(10) C 0.9737(6) 0.2743(6) 0.6094(5) 0.059(2) Uani 1.00 1 d . . .
 C(11) C 0.8317(6) 0.2876(5) 0.5835(5) 0.059(2) Uani 1.00 1 d . . .
 C(12) C 0.7262(7) 0.1745(6) 0.6913(5) 0.060(2) Uani 1.00 1 d . . .
 C(14) C 0.7461(7) 0.2079(5) 0.5970(5) 0.057(2) Uani 1.00 1 d . . .
 C(15) C 0.6430(7) -0.0698(6) 0.4814(6) 0.072(3) Uani 1.00 1 d . . .
 C(16) C 0.6835(8) 0.0892(6) 0.6941(6) 0.070(3) Uani 1.00 1 d . . .
 C(17) C 0.6745(7) 0.0372(6) 0.6156(7) 0.068(2) Uani 1.00 1 d . . .
 C(18) C 0.7794(8) 0.4153(6) 0.4655(6) 0.083(3) Uani 1.00 1 d . . .
 C(19) C 0.7058(7) 0.0071(6) 0.4641(6) 0.069(3) Uani 1.00 1 d . . .
 C(20) C 0.7437(8) 0.0208(6) 0.3804(6) 0.083(3) Uani 1.00 1 d . . .
 C(21) C 1.0384(7) 0.3585(6) 0.5863(6) 0.080(3) Uani 1.00 1 d . . .
 C(22) C 0.8280(7) 0.2740(6) 0.4023(5) 0.074(3) Uani 1.00 1 d . . .
 C(23) C 0.6189(7) -0.1303(6) 0.4140(8) 0.086(3) Uani 1.00 1 d . . .
 C(24) C 1.0280(7) 0.1973(6) 0.5623(6) 0.084(3) Uani 1.00 1 d . . .
 C(25) C 0.7362(8) 0.2258(7) 0.7718(5) 0.081(3) Uani 1.00 1 d . . .
 C(26) C 1.0088(7) 0.2576(7) 0.7166(5) 0.094(3) Uani 1.00 1 d . . .
 C(27) C 0.6402(7) 0.2889(7) 0.4739(6) 0.086(3) Uani 1.00 1 d . . .
 C(28) C 0.6410(10) 0.0515(9) 0.7734(8) 0.092(4) Uani 1.00 1 d . . .
 C(29) C 0.6506(10) -0.1158(8) 0.3283(7) 0.094(4) Uani 1.00 1 d . . .
 C(30) C 0.7123(11) -0.0424(7) 0.3134(7) 0.097(4) Uani 1.00 1 d . . .
 C(31) C 0.7040(10) 0.1855(9) 0.8512(7) 0.105(4) Uani 1.00 1 d . . .
 C(32) C 0.5357(8) 0.4093(7) 0.6969(7) 0.092(3) Uani 1.00 1 d . . .
 C(34) C 0.6541(12) 0.1051(9) 0.8496(8) 0.113(5) Uani 1.00 1 d . . .
 H(1) H 0.6125 0.2598 0.4165 0.104 Uiso 1.00 1 c R . .
 H(2) H 0.5909 0.3393 0.4779 0.103 Uiso 1.00 1 c R . .
 H(3) H 0.7048 0.4407 0.4763 0.101 Uiso 1.00 1 c R . .
 H(4) H 0.7894 0.4267 0.4032 0.101 Uiso 1.00 1 c R . .
 H(5) H 0.8462 0.4401 0.5072 0.101 Uiso 1.00 1 c R . .
 H(6) H 1.0536 0.3553 0.5243 0.095 Uiso 1.00 1 c R . .
 H(7) H 1.1141 0.3647 0.6281 0.095 Uiso 1.00 1 c R . .
 H(8) H 0.9875 0.4075 0.5923 0.095 Uiso 1.00 1 c R . .
 H(9) H 0.8983 0.3060 0.3927 0.088 Uiso 1.00 1 c R . .
 H(10) H 0.7679 0.2755 0.3472 0.088 Uiso 1.00 1 c R . .
 H(11) H 0.8505 0.2150 0.4173 0.088 Uiso 1.00 1 c R . .
 H(12) H 1.0280 0.1462 0.5995 0.100 Uiso 1.00 1 c R . .
 H(13) H 1.1097 0.2105 0.5551 0.100 Uiso 1.00 1 c R . .
 H(14) H 0.9791 0.1875 0.5029 0.100 Uiso 1.00 1 c R . .
 H(15) H 1.0233 0.3120 0.7483 0.109 Uiso 1.00 1 c R . .
 H(16) H 1.0804 0.2222 0.7299 0.109 Uiso 1.00 1 c R . .
 H(17) H 0.9423 0.2284 0.7369 0.109 Uiso 1.00 1 c R . .
 H(18) H 0.7880 0.0718 0.3689 0.098 Uiso 1.00 1 c R . .
 H(19) H 0.5757 -0.1818 0.4253 0.097 Uiso 1.00 1 c R . .
 H(20) H 0.7664 0.2842 0.7745 0.098 Uiso 1.00 1 c R . .
 H(21) H 0.6319 -0.1588 0.2809 0.110 Uiso 1.00 1 c R . .
 H(22) H 0.7345 -0.0348 0.2538 0.113 Uiso 1.00 1 c R . .
 H(23) H 0.7127 0.2169 0.9083 0.129 Uiso 1.00 1 c R . .
 H(24) H 0.6326 0.0831 0.9056 0.142 Uiso 1.00 1 c R . .
 H(25) H 0.5989 0.3738 0.6801 0.111 Uiso 1.00 1 c R . .


loop_
_atom_site_aniso_label
_atom_site_aniso_U_11
_atom_site_aniso_U_22
_atom_site_aniso_U_33
_atom_site_aniso_U_12
_atom_site_aniso_U_13
_atom_site_aniso_U_23
 Cl(2) 0.091(2) 0.102(2) 0.173(3) -0.0059(18) -0.008(2) 0.028(2)
 Cl(3) 0.099(2) 0.181(3) 0.140(3) 0.008(2) 0.038(2) 0.010(2)
 Cl(4) 0.090(2) 0.107(2) 0.379(6) -0.020(2) 0.044(3) -0.083(3)
 S(1) 0.0678(15) 0.0806(19) 0.113(2) 0.0056(13) 0.0241(15) 0.0231(16)
 O(1) 0.139(7) 0.120(7) 0.116(6) 0.048(5) 0.069(5) 0.058(5)
 O(5) 0.045(3) 0.089(4) 0.061(3) 0.001(2) 0.002(2) 0.024(3)
 O(6) 0.064(3) 0.064(3) 0.065(3) -0.005(2) 0.025(2) -0.008(3)
 O(7) 0.067(3) 0.066(4) 0.062(3) 0.012(2) 0.014(2) -0.011(3)
 N(1) 0.056(4) 0.065(5) 0.076(5) 0.001(3) 0.021(3) 0.006(4)
 C(1) 0.046(4) 0.076(6) 0.044(4) 0.002(4) -0.003(3) 0.011(4)
 C(10) 0.045(4) 0.081(6) 0.049(4) -0.001(4) -0.002(3) -0.006(4)
 C(11) 0.051(4) 0.075(6) 0.047(4) 0.001(4) -0.003(3) 0.004(4)
 C(12) 0.064(5) 0.074(6) 0.043(4) 0.009(4) 0.015(3) 0.005(4)
 C(14) 0.057(4) 0.068(5) 0.044(4) 0.004(4) 0.005(3) -0.000(4)
 C(15) 0.050(5) 0.077(7) 0.092(7) 0.012(4) 0.018(4) 0.009(6)
 C(16) 0.076(6) 0.075(6) 0.062(6) 0.019(5) 0.021(5) 0.025(5)
 C(17) 0.049(4) 0.066(6) 0.086(6) 0.004(4) 0.003(4) 0.022(5)
 C(18) 0.070(6) 0.103(8) 0.078(6) -0.003(5) 0.020(5) 0.022(6)
 C(19) 0.062(5) 0.072(6) 0.072(6) -0.001(4) 0.005(4) -0.007(5)
 C(20) 0.100(7) 0.091(8) 0.055(5) -0.011(6) 0.005(5) -0.013(5)
 C(21) 0.051(5) 0.098(7) 0.089(7) -0.008(5) 0.007(4) -0.016(5)
 C(22) 0.077(5) 0.097(7) 0.045(4) -0.014(5) 0.004(4) 0.004(5)
 C(23) 0.059(5) 0.054(6) 0.130(9) -0.000(4) -0.023(6) -0.020(6)
 C(24) 0.046(4) 0.108(8) 0.096(7) 0.006(5) 0.005(4) -0.007(6)
 C(25) 0.096(6) 0.103(8) 0.045(5) 0.026(6) 0.017(5) 0.008(5)
 C(26) 0.052(5) 0.166(11) 0.053(5) 0.000(6) -0.019(4) 0.001(6)
 C(27) 0.073(6) 0.109(8) 0.077(6) 0.004(5) 0.014(5) 0.030(6)
 C(28) 0.084(7) 0.121(10) 0.078(7) 0.042(7) 0.031(6) 0.050(8)
 C(29) 0.094(8) 0.108(10) 0.072(7) 0.019(7) -0.007(6) -0.017(7)
 C(30) 0.132(10) 0.082(8) 0.069(7) 0.012(7) -0.005(6) -0.019(6)
 C(31) 0.109(8) 0.130(11) 0.084(8) 0.035(8) 0.037(6) 0.013(8)
 C(32) 0.067(6) 0.095(8) 0.114(8) 0.004(5) 0.017(5) 0.035(6)
 C(34) 0.162(11) 0.119(10) 0.074(8) 0.076(9) 0.061(8) 0.050(8)

#==============================================================================

_computing_data_collection            'DTREK'
_computing_cell_refinement            'DTREK'
_computing_data_reduction             'CrystalStructure'
_computing_structure_solution         'SIR92'
_computing_structure_refinement       'CRYSTALS'
_computing_publication_material       'CrystalStructure 3.8'
_computing_molecular_graphics          ?

#==============================================================================

# MOLECULAR GEOMETRY

_geom_special_details
;
    ENTER SPECIAL DETAILS OF THE MOLECULAR GEOMETRY
;

loop_
_geom_bond_atom_site_label_1
_geom_bond_atom_site_label_2
_geom_bond_distance
_geom_bond_publ_flag
_geom_bond_site_symmetry_1
_geom_bond_site_symmetry_2
Cl(2) C(32) 1.685(11) yes . .
Cl(3) C(32) 1.813(11) yes . .
Cl(4) C(32) 1.665(9) yes . .
S(1) C(15) 1.765(10) yes . .
S(1) C(17) 1.733(9) yes . .
O(1) C(28) 1.277(16) yes . .
O(5) C(14) 1.380(8) yes . .
O(5) C(27) 1.423(11) yes . .
O(6) N(1) 1.391(9) yes . .
O(6) C(14) 1.468(10) yes . .
O(7) C(11) 1.425(10) yes . .
N(1) C(17) 1.344(12) yes . .
N(1) C(19) 1.375(12) yes . .
C(1) C(11) 1.588(10) yes . .
C(1) C(18) 1.510(13) yes . .
C(1) C(22) 1.521(11) yes . .
C(1) C(27) 1.546(11) yes . .
C(10) C(11) 1.563(10) yes . .
C(10) C(21) 1.536(12) yes . .
C(10) C(24) 1.535(13) yes . .
C(10) C(26) 1.566(10) yes . .
C(11) C(14) 1.574(12) yes . .
C(12) C(14) 1.519(11) yes . .
C(12) C(16) 1.388(13) yes . .
C(12) C(25) 1.399(12) yes . .
C(15) C(19) 1.408(14) yes . .
C(15) C(23) 1.341(14) yes . .
C(16) C(17) 1.382(13) yes . .
C(16) C(28) 1.442(16) yes . .
C(19) C(20) 1.374(13) yes . .
C(20) C(30) 1.374(14) yes . .
C(23) C(29) 1.373(17) yes . .
C(25) C(31) 1.411(15) yes . .
C(28) C(34) 1.367(18) yes . .
C(29) C(30) 1.349(17) yes . .
C(31) C(34) 1.344(19) yes . .
C(18) H(3) 0.950 no . .
C(18) H(4) 0.950 no . .
C(18) H(5) 0.950 no . .
C(20) H(18) 0.950 no . .
C(21) H(6) 0.950 no . .
C(21) H(7) 0.950 no . .
C(21) H(8) 0.950 no . .
C(22) H(9) 0.950 no . .
C(22) H(10) 0.950 no . .
C(22) H(11) 0.950 no . .
C(23) H(19) 0.950 no . .
C(24) H(12) 0.950 no . .
C(24) H(13) 0.950 no . .
C(24) H(14) 0.950 no . .
C(25) H(20) 0.950 no . .
C(26) H(15) 0.950 no . .
C(26) H(16) 0.950 no . .
C(26) H(17) 0.950 no . .
C(27) H(1) 0.950 no . .
C(27) H(2) 0.950 no . .
C(29) H(21) 0.950 no . .
C(30) H(22) 0.950 no . .
C(31) H(23) 0.950 no . .
C(32) H(25) 0.950 no . .
C(34) H(24) 0.950 no . .

loop_
_geom_angle_atom_site_label_1
_geom_angle_atom_site_label_2
_geom_angle_atom_site_label_3
_geom_angle
_geom_angle_publ_flag
_geom_angle_site_symmetry_1
_geom_angle_site_symmetry_2
_geom_angle_site_symmetry_3
C(15) S(1) C(17) 92.5(4) yes . . .
C(14) O(5) C(27) 111.8(6) yes . . .
N(1) O(6) C(14) 112.2(5) yes . . .
O(6) N(1) C(17) 119.2(6) yes . . .
O(6) N(1) C(19) 121.3(7) yes . . .
C(17) N(1) C(19) 118.9(7) yes . . .
C(11) C(1) C(18) 114.0(6) yes . . .
C(11) C(1) C(22) 116.5(6) yes . . .
C(11) C(1) C(27) 101.2(6) yes . . .
C(18) C(1) C(22) 107.3(7) yes . . .
C(18) C(1) C(27) 108.8(7) yes . . .
C(22) C(1) C(27) 108.7(6) yes . . .
C(11) C(10) C(21) 109.0(6) yes . . .
C(11) C(10) C(24) 116.5(6) yes . . .
C(11) C(10) C(26) 109.0(6) yes . . .
C(21) C(10) C(24) 108.0(7) yes . . .
C(21) C(10) C(26) 108.1(6) yes . . .
C(24) C(10) C(26) 105.9(7) yes . . .
O(7) C(11) C(1) 105.1(6) yes . . .
O(7) C(11) C(10) 110.8(5) yes . . .
O(7) C(11) C(14) 101.0(6) yes . . .
C(1) C(11) C(10) 118.4(6) yes . . .
C(1) C(11) C(14) 101.3(5) yes . . .
C(10) C(11) C(14) 118.1(6) yes . . .
C(14) C(12) C(16) 116.4(7) yes . . .
C(14) C(12) C(25) 124.7(8) yes . . .
C(16) C(12) C(25) 118.6(8) yes . . .
O(5) C(14) O(6) 107.5(5) yes . . .
O(5) C(14) C(11) 104.7(6) yes . . .
O(5) C(14) C(12) 106.1(6) yes . . .
O(6) C(14) C(11) 103.5(6) yes . . .
O(6) C(14) C(12) 110.2(6) yes . . .
C(11) C(14) C(12) 123.9(6) yes . . .
S(1) C(15) C(19) 109.3(7) yes . . .
S(1) C(15) C(23) 131.8(8) yes . . .
C(19) C(15) C(23) 118.9(9) yes . . .
C(12) C(16) C(17) 119.3(8) yes . . .
C(12) C(16) C(28) 123.9(9) yes . . .
C(17) C(16) C(28) 116.7(9) yes . . .
S(1) C(17) N(1) 108.6(6) yes . . .
S(1) C(17) C(16) 129.0(8) yes . . .
N(1) C(17) C(16) 122.4(8) yes . . .
N(1) C(19) C(15) 110.7(8) yes . . .
N(1) C(19) C(20) 127.8(8) yes . . .
C(15) C(19) C(20) 121.5(9) yes . . .
C(19) C(20) C(30) 116.5(9) yes . . .
C(15) C(23) C(29) 120.5(9) yes . . .
C(12) C(25) C(31) 116.8(10) yes . . .
O(5) C(27) C(1) 108.6(6) yes . . .
O(1) C(28) C(16) 119.2(10) yes . . .
O(1) C(28) C(34) 126.6(12) yes . . .
C(16) C(28) C(34) 114.2(11) yes . . .
C(23) C(29) C(30) 119.8(10) yes . . .
C(20) C(30) C(29) 122.7(10) yes . . .
C(25) C(31) C(34) 123.0(11) yes . . .
Cl(2) C(32) Cl(3) 106.2(5) yes . . .
Cl(2) C(32) Cl(4) 113.4(5) yes . . .
Cl(3) C(32) Cl(4) 108.1(6) yes . . .
C(28) C(34) C(31) 123.0(12) yes . . .
C(1) C(18) H(3) 109.3 no . . .
C(1) C(18) H(4) 109.3 no . . .
C(1) C(18) H(5) 109.8 no . . .
H(3) C(18) H(4) 109.5 no . . .
H(3) C(18) H(5) 109.5 no . . .
H(4) C(18) H(5) 109.5 no . . .
C(19) C(20) H(18) 121.9 no . . .
C(30) C(20) H(18) 121.5 no . . .
C(10) C(21) H(6) 109.4 no . . .
C(10) C(21) H(7) 109.6 no . . .
C(10) C(21) H(8) 109.4 no . . .
H(6) C(21) H(7) 109.5 no . . .
H(6) C(21) H(8) 109.5 no . . .
H(7) C(21) H(8) 109.5 no . . .
C(1) C(22) H(9) 108.4 no . . .
C(1) C(22) H(10) 108.8 no . . .
C(1) C(22) H(11) 111.2 no . . .
H(9) C(22) H(10) 109.5 no . . .
H(9) C(22) H(11) 109.5 no . . .
H(10) C(22) H(11) 109.5 no . . .
C(15) C(23) H(19) 119.0 no . . .
C(29) C(23) H(19) 120.5 no . . .
C(10) C(24) H(12) 109.6 no . . .
C(10) C(24) H(13) 110.0 no . . .
C(10) C(24) H(14) 108.9 no . . .
H(12) C(24) H(13) 109.5 no . . .
H(12) C(24) H(14) 109.5 no . . .
H(13) C(24) H(14) 109.5 no . . .
C(12) C(25) H(20) 122.4 no . . .
C(31) C(25) H(20) 120.7 no . . .
C(10) C(26) H(15) 109.6 no . . .
C(10) C(26) H(16) 110.4 no . . .
C(10) C(26) H(17) 108.5 no . . .
H(15) C(26) H(16) 109.5 no . . .
H(15) C(26) H(17) 109.5 no . . .
H(16) C(26) H(17) 109.5 no . . .
O(5) C(27) H(1) 109.9 no . . .
O(5) C(27) H(2) 109.4 no . . .
C(1) C(27) H(1) 110.4 no . . .
C(1) C(27) H(2) 109.1 no . . .
H(1) C(27) H(2) 109.5 no . . .
C(23) C(29) H(21) 119.6 no . . .
C(30) C(29) H(21) 120.5 no . . .
C(20) C(30) H(22) 119.5 no . . .
C(29) C(30) H(22) 117.9 no . . .
C(25) C(31) H(23) 119.9 no . . .
C(34) C(31) H(23) 117.0 no . . .
Cl(2) C(32) H(25) 110.1 no . . .
Cl(3) C(32) H(25) 110.3 no . . .
Cl(4) C(32) H(25) 108.6 no . . .
C(28) C(34) H(24) 118.7 no . . .
C(31) C(34) H(24) 118.1 no . . .

loop_
_geom_torsion_atom_site_label_1
_geom_torsion_atom_site_label_2
_geom_torsion_atom_site_label_3
_geom_torsion_atom_site_label_4
_geom_torsion
_geom_torsion_publ_flag
_geom_torsion_site_symmetry_1
_geom_torsion_site_symmetry_2
_geom_torsion_site_symmetry_3
_geom_torsion_site_symmetry_4
C(15) S(1) C(17) N(1) 0.5(6) ? . . . .
C(15) S(1) C(17) C(16) 179.2(8) ? . . . .
C(17) S(1) C(15) C(19) -0.1(5) ? . . . .
C(17) S(1) C(15) C(23) -178.3(9) ? . . . .
C(14) O(5) C(27) C(1) -9.5(9) ? . . . .
C(27) O(5) C(14) O(6) -80.8(8) ? . . . .
C(27) O(5) C(14) C(11) 28.8(8) ? . . . .
C(27) O(5) C(14) C(12) 161.3(7) ? . . . .
N(1) O(6) C(14) O(5) -63.4(7) ? . . . .
N(1) O(6) C(14) C(11) -173.8(5) ? . . . .
N(1) O(6) C(14) C(12) 51.8(7) ? . . . .
C(14) O(6) N(1) C(17) -40.4(8) ? . . . .
C(14) O(6) N(1) C(19) 149.1(6) ? . . . .
O(6) N(1) C(17) S(1) -171.6(5) ? . . . .
O(6) N(1) C(17) C(16) 9.6(11) ? . . . .
O(6) N(1) C(19) C(15) 171.3(6) ? . . . .
O(6) N(1) C(19) C(20) -9.9(12) ? . . . .
C(17) N(1) C(19) C(15) 0.8(10) ? . . . .
C(17) N(1) C(19) C(20) 179.6(8) ? . . . .
C(19) N(1) C(17) S(1) -0.9(9) ? . . . .
C(19) N(1) C(17) C(16) -179.7(7) ? . . . .
C(18) C(1) C(11) O(7) 40.3(8) ? . . . .
C(18) C(1) C(11) C(10) -84.0(9) ? . . . .
C(18) C(1) C(11) C(14) 145.1(7) ? . . . .
C(22) C(1) C(11) O(7) 166.1(6) ? . . . .
C(22) C(1) C(11) C(10) 41.8(10) ? . . . .
C(22) C(1) C(11) C(14) -89.1(7) ? . . . .
C(11) C(1) C(27) O(5) -13.8(9) ? . . . .
C(27) C(1) C(11) O(7) -76.2(7) ? . . . .
C(27) C(1) C(11) C(10) 159.4(7) ? . . . .
C(27) C(1) C(11) C(14) 28.5(8) ? . . . .
C(18) C(1) C(27) O(5) -134.1(7) ? . . . .
C(22) C(1) C(27) O(5) 109.3(7) ? . . . .
C(21) C(10) C(11) O(7) -67.0(8) ? . . . .
C(21) C(10) C(11) C(1) 54.5(9) ? . . . .
C(21) C(10) C(11) C(14) 177.3(6) ? . . . .
C(24) C(10) C(11) O(7) 170.6(6) ? . . . .
C(24) C(10) C(11) C(1) -68.0(10) ? . . . .
C(24) C(10) C(11) C(14) 54.8(9) ? . . . .
C(26) C(10) C(11) O(7) 50.9(9) ? . . . .
C(26) C(10) C(11) C(1) 172.4(7) ? . . . .
C(26) C(10) C(11) C(14) -64.9(9) ? . . . .
O(7) C(11) C(14) O(5) 72.5(6) ? . . . .
O(7) C(11) C(14) O(6) -175.0(4) ? . . . .
O(7) C(11) C(14) C(12) -48.9(9) ? . . . .
C(1) C(11) C(14) O(5) -35.5(7) ? . . . .
C(1) C(11) C(14) O(6) 76.9(6) ? . . . .
C(1) C(11) C(14) C(12) -156.9(7) ? . . . .
C(10) C(11) C(14) O(5) -166.6(6) ? . . . .
C(10) C(11) C(14) O(6) -54.1(7) ? . . . .
C(10) C(11) C(14) C(12) 72.0(10) ? . . . .
C(14) C(12) C(16) C(17) 7.0(11) ? . . . .
C(14) C(12) C(16) C(28) -169.7(8) ? . . . .
C(16) C(12) C(14) O(5) 80.0(9) ? . . . .
C(16) C(12) C(14) O(6) -36.0(9) ? . . . .
C(16) C(12) C(14) C(11) -159.2(7) ? . . . .
C(14) C(12) C(25) C(31) 174.6(8) ? . . . .
C(25) C(12) C(14) O(5) -93.4(9) ? . . . .
C(25) C(12) C(14) O(6) 150.6(7) ? . . . .
C(25) C(12) C(14) C(11) 27.4(12) ? . . . .
C(16) C(12) C(25) C(31) 1.4(12) ? . . . .
C(25) C(12) C(16) C(17) -179.2(7) ? . . . .
C(25) C(12) C(16) C(28) 4.1(13) ? . . . .
S(1) C(15) C(19) N(1) -0.4(8) ? . . . .
S(1) C(15) C(19) C(20) -179.2(7) ? . . . .
S(1) C(15) C(23) C(29) 175.5(7) ? . . . .
C(19) C(15) C(23) C(29) -2.6(13) ? . . . .
C(23) C(15) C(19) N(1) 178.1(7) ? . . . .
C(23) C(15) C(19) C(20) -0.8(13) ? . . . .
C(12) C(16) C(17) S(1) -170.7(6) ? . . . .
C(12) C(16) C(17) N(1) 7.9(12) ? . . . .
C(12) C(16) C(28) O(1) 175.0(9) ? . . . .
C(12) C(16) C(28) C(34) -4.3(14) ? . . . .
C(17) C(16) C(28) O(1) -1.8(14) ? . . . .
C(17) C(16) C(28) C(34) 178.9(9) ? . . . .
C(28) C(16) C(17) S(1) 6.3(12) ? . . . .
C(28) C(16) C(17) N(1) -175.2(8) ? . . . .
N(1) C(19) C(20) C(30) -175.7(9) ? . . . .
C(15) C(19) C(20) C(30) 2.9(13) ? . . . .
C(19) C(20) C(30) C(29) -1.9(15) ? . . . .
C(15) C(23) C(29) C(30) 3.6(15) ? . . . .
C(12) C(25) C(31) C(34) -6.7(16) ? . . . .
O(1) C(28) C(34) C(31) 179.7(8) ? . . . .
C(16) C(28) C(34) C(31) -1.1(16) ? . . . .
C(23) C(29) C(30) C(20) -1.3(17) ? . . . .
C(25) C(31) C(34) C(28) 7(2) ? . . . .


#==============================================================================

# Additional structures and associated data_? identifiers
# should be added at this point if there is more than one 
# structure analysis in the CIF.

#==============================================================================

#     End of CIF

#==============================================================================
